# Supplementary material
Source: publisher site journal article supplement (https://www.dovepress.com/article/306367)
Supplement: Supplementary file 1 [file get_supplementary_file.php]

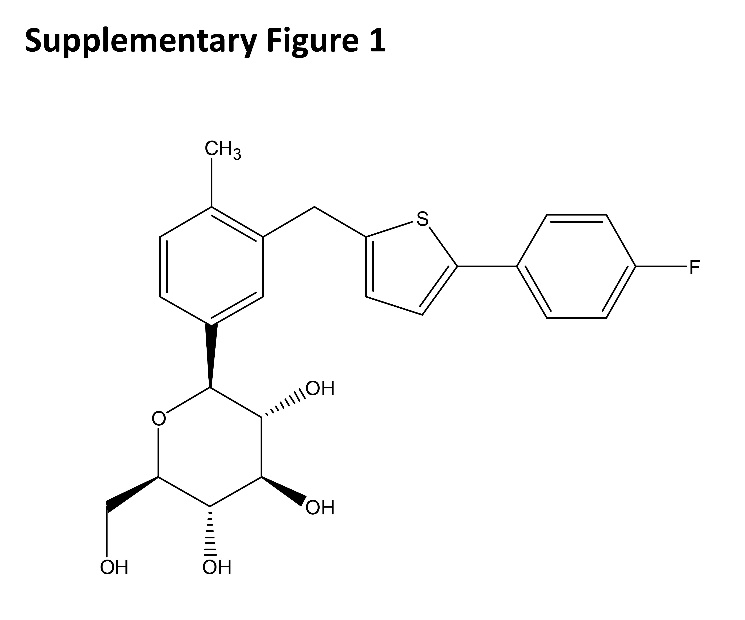
Supplementary figure 1: Chemical structural formula of Canagliflozin


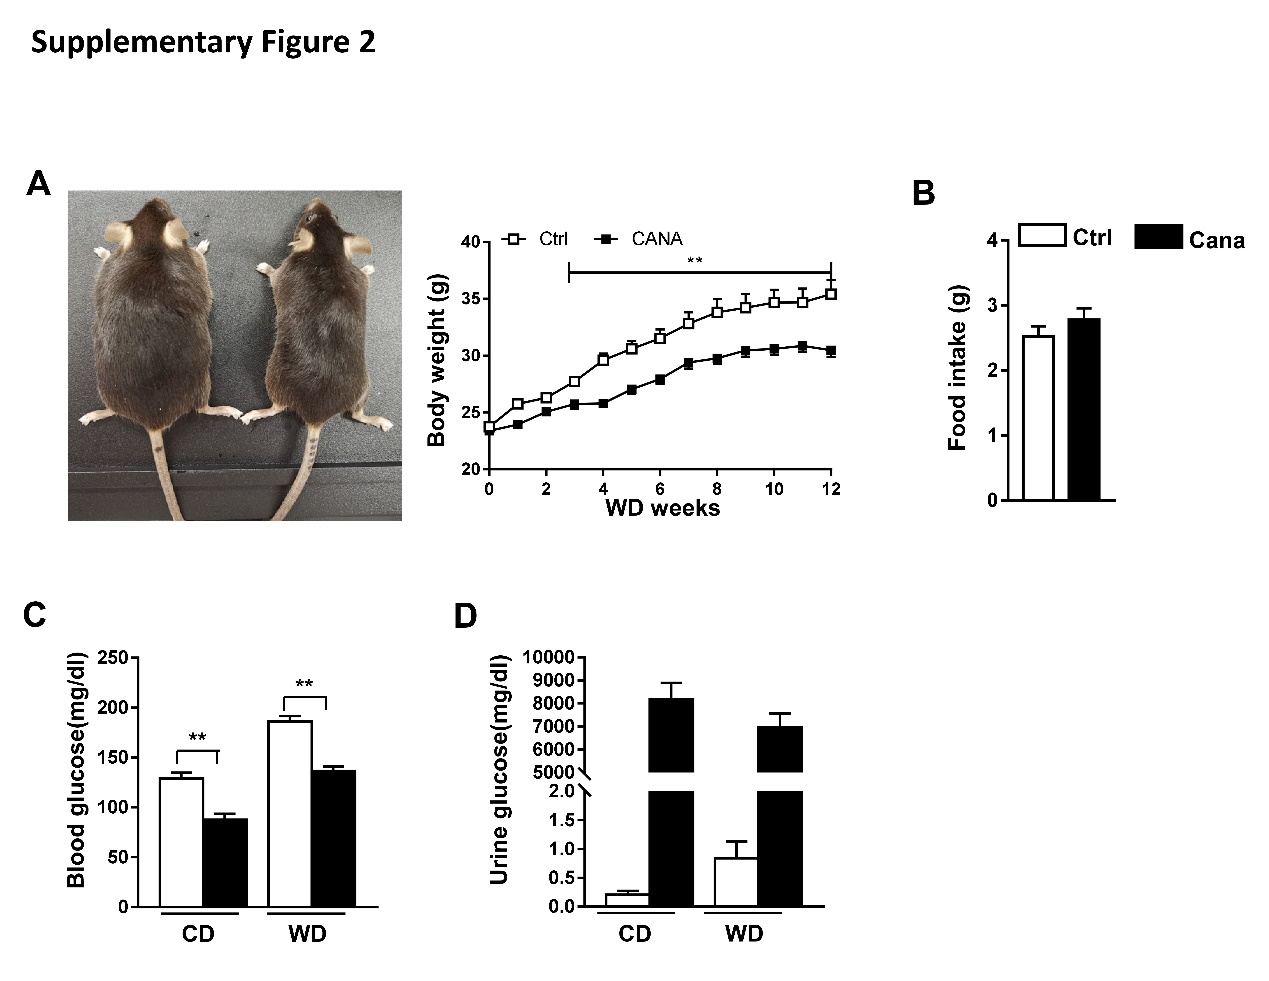
 **Supplementary figure 2: Biochemical parameters of Cana treated mice**

(**A**)Photographs, body weight and (**B**) food intake of control and Cana treatment mice after 12 weeks Western diet (n=8). (**C**) Blood glucose and (**D**) urine glucose was detected in mice fed with chow diet and western diet (n=8). The data was shown with mean ± SEM. *P<0.05, **P<0.01 compared with control or DMSO group.


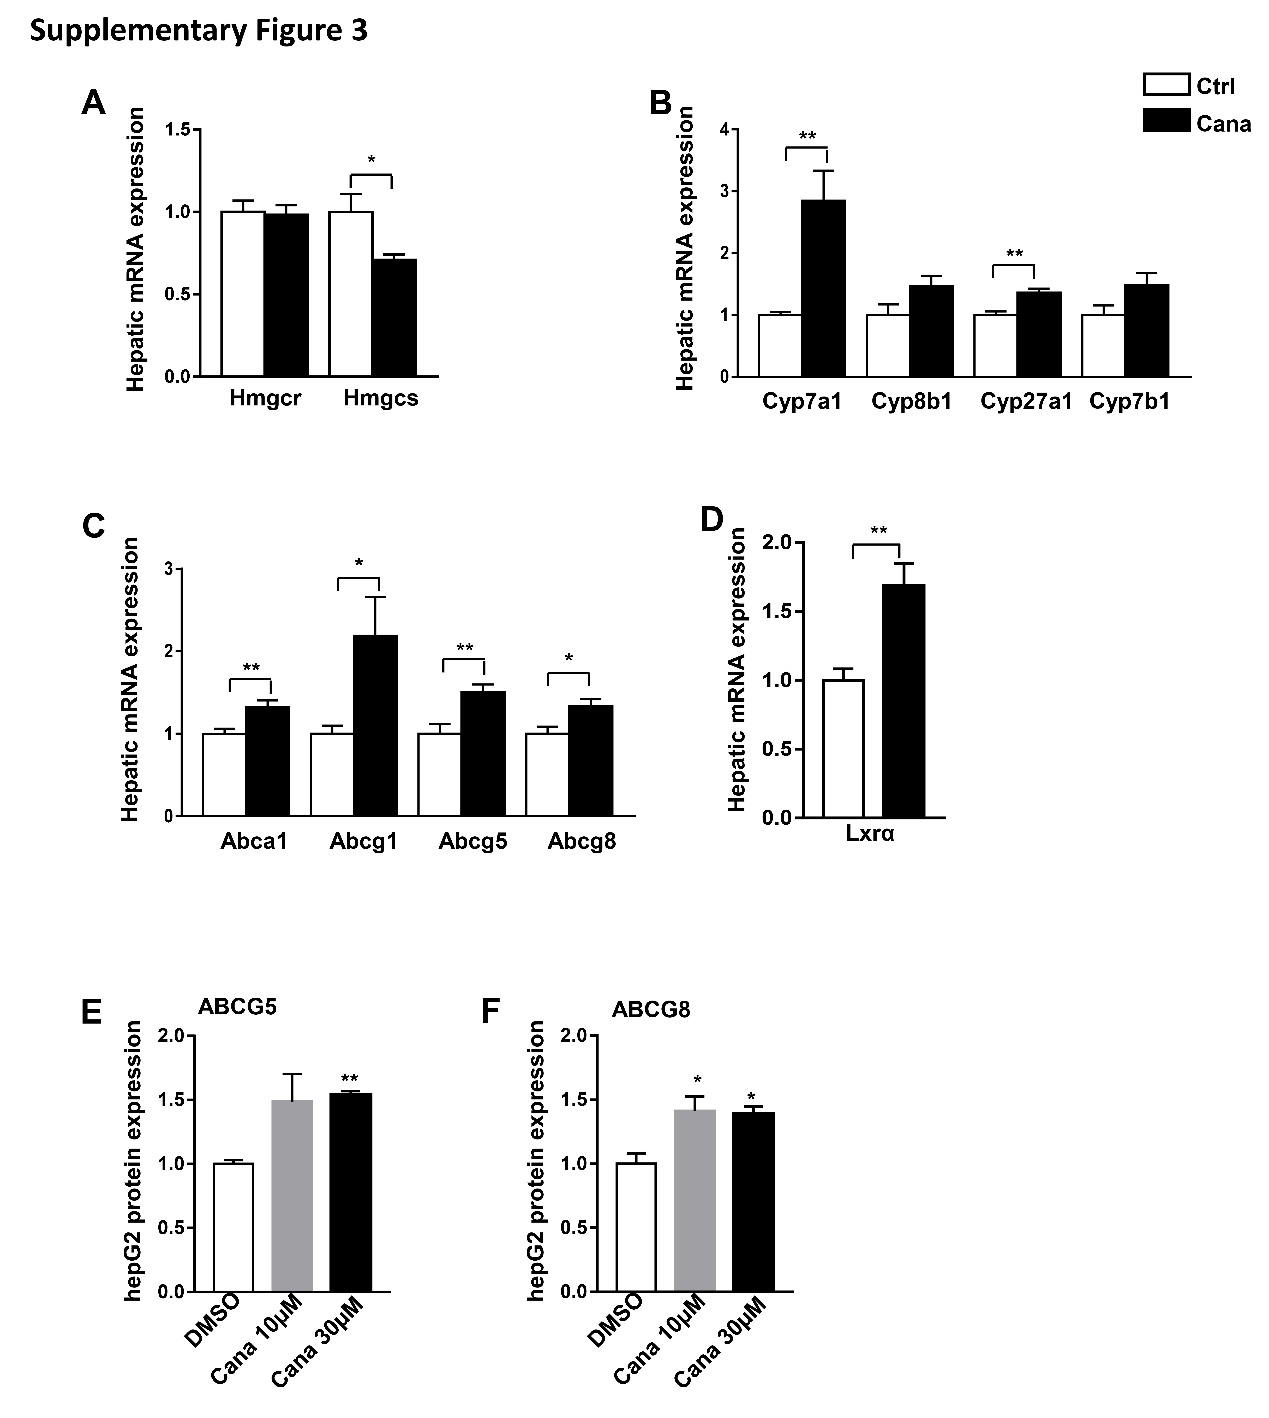


**Supplementary figure 3: Cana upregulated hepatic cholesterol transport**

8 weeks old C57BL/6J mice were fed chow diet for 12 weeks (n=8). (**A**) Real-time PCR analyzed of hepatic mRNA levels of cholesterol biosynthesis, (**B**) bile acid synthesis from cholesterol, (**C**) cholesterol efflux (**D**) and cholesterol regulator gene LXR. The quantification of (**E**) ABCG5 and (**F**) ABCG8 protein expression of hepG2 cells treated with Cana were shown. The data was shown with mean ±SEM. *P<0.05, **P<0.01 compared with control or DMSO group.


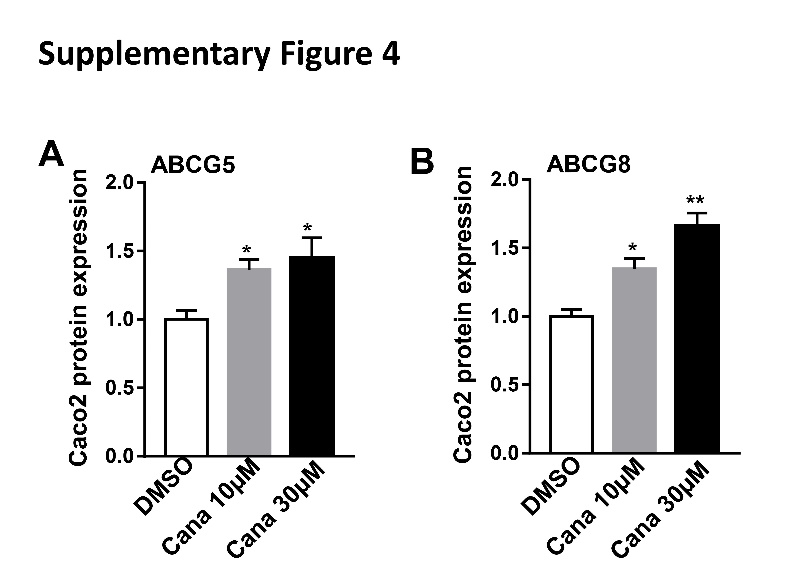


**Supplementary figure 4: Cana increased ABCG5/8 expression in Caco2 cells**

The quantification of (**E**) ABCG5 and (**F**) ABCG8 protein expression of Caco2 cells treated with Cana were shown. The data was shown with mean ±SEM. *P<0.05, **P<0.01 compared with DMSO group.


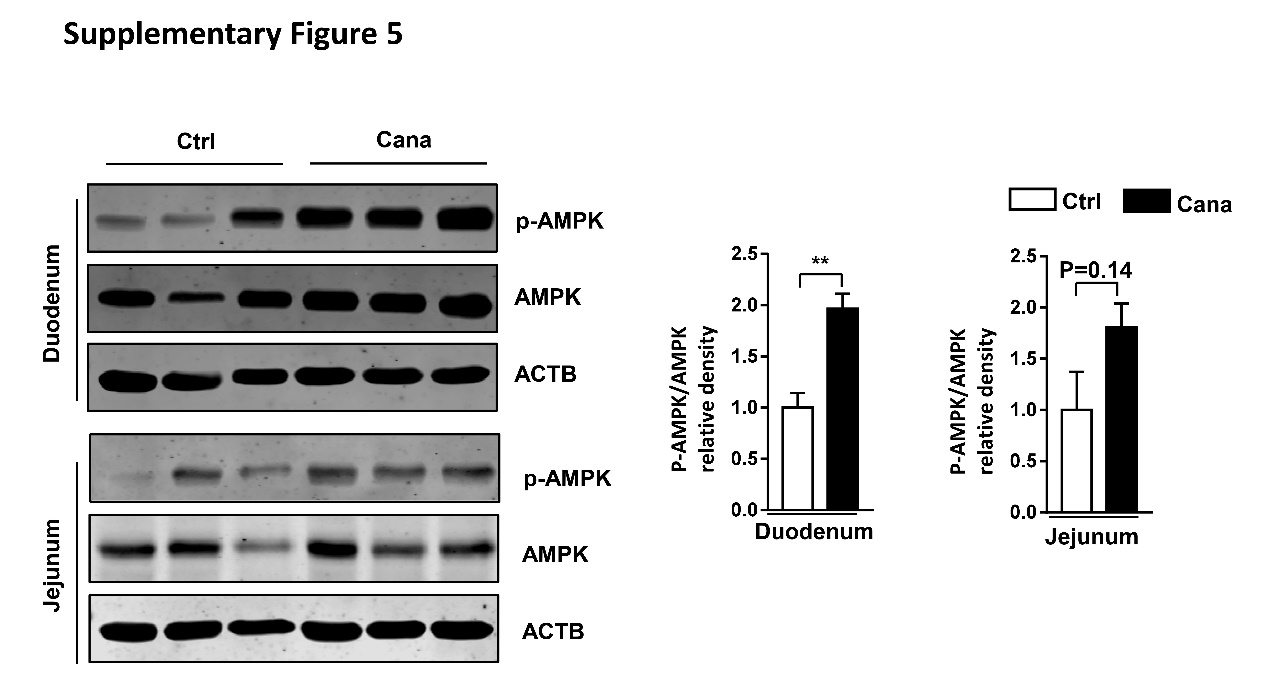


Supplementary figure 5: Cana activated AMPK pathway in duodenum and jejunum

P-AMPK and AMPK protein expression in duodenum and jejunum of western diet fed mice were detected and the ratio of p-AMPK/AMPK was shown (n=3). The data was shown with mean ±SEM. **P<0.01 compared with control.


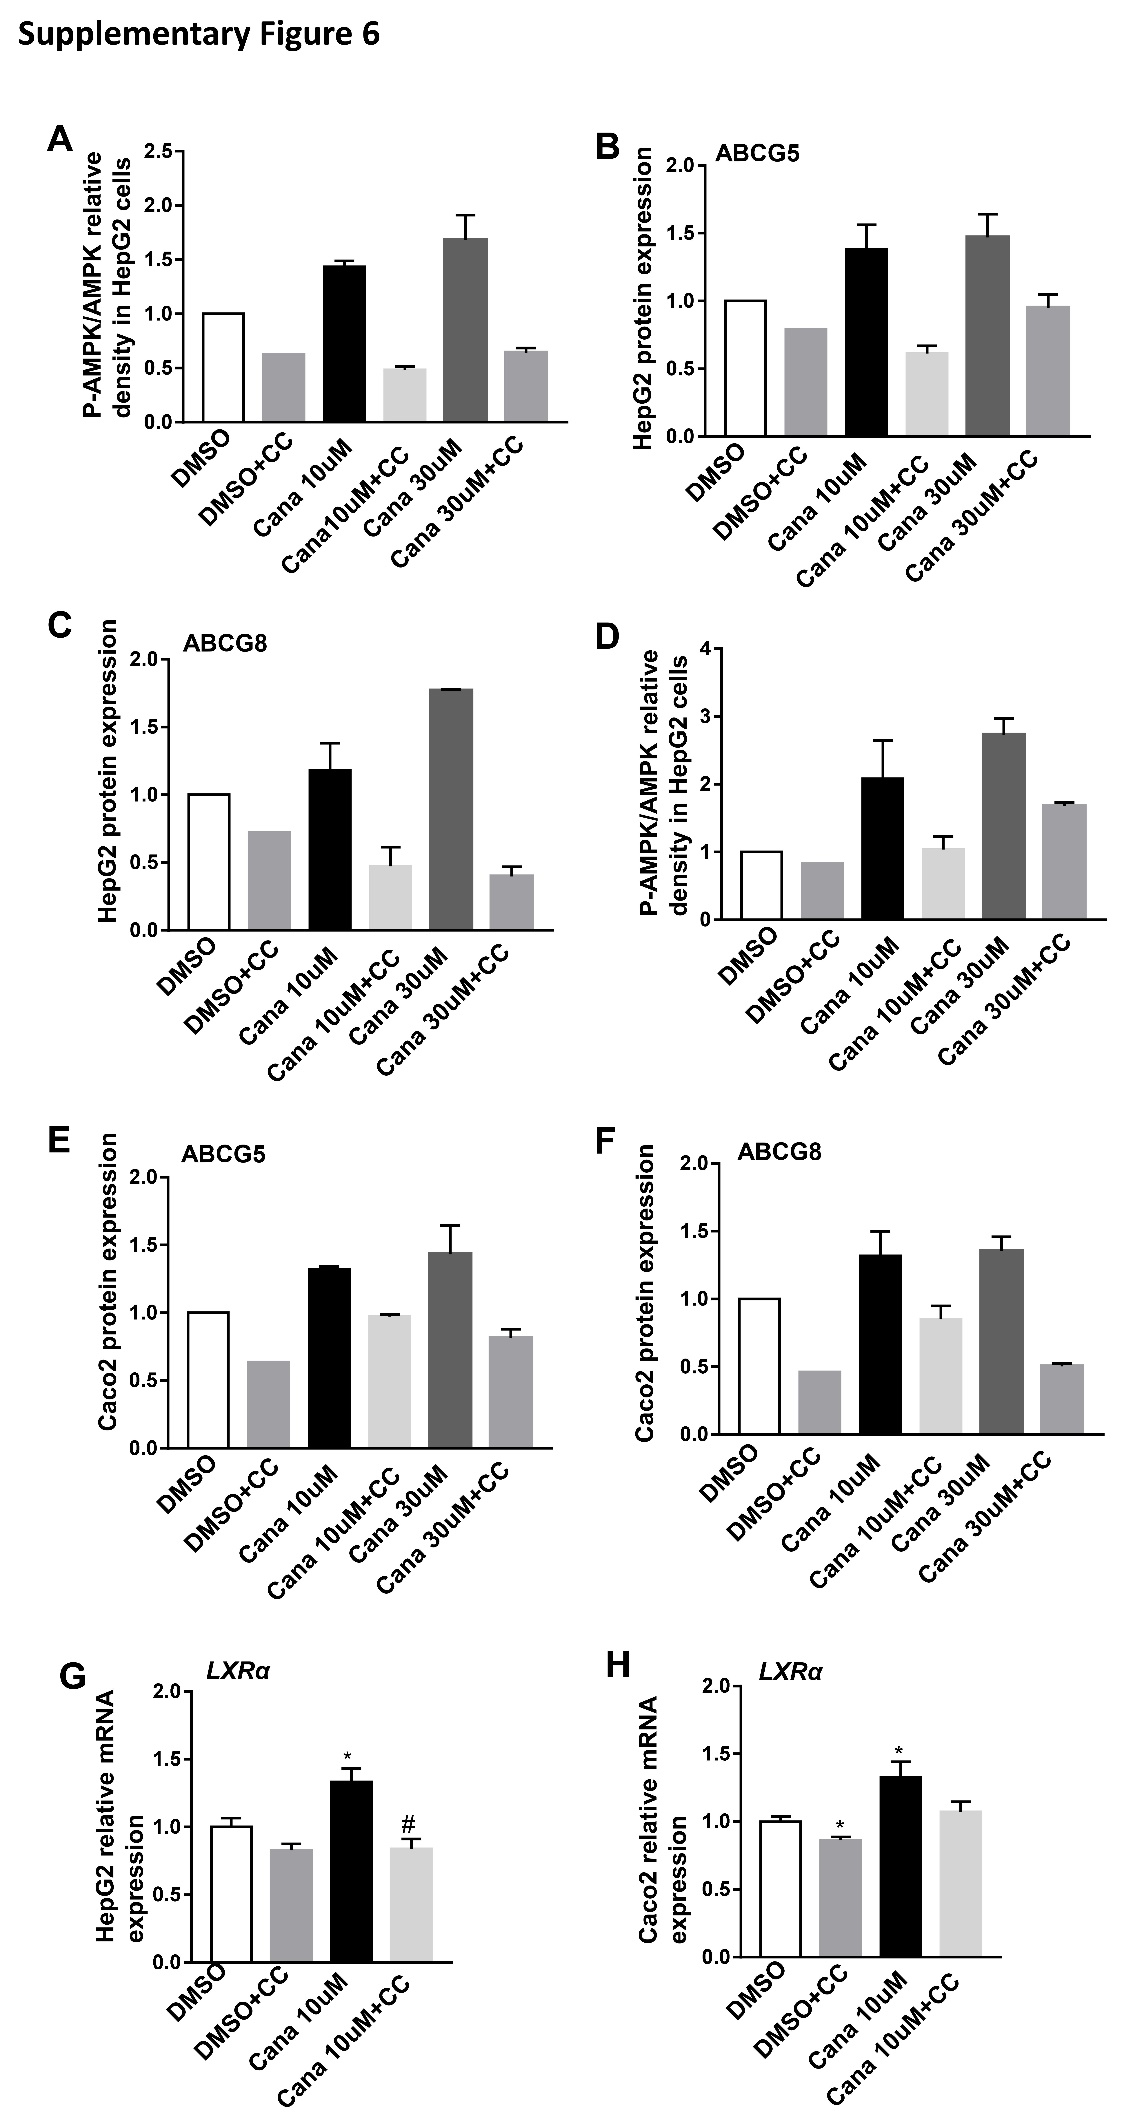


Supplementary figure 6: Cana increased Abcg5/8 expression.

HepG2 and Caco2 cells were treated with Cana (10µM or 30µM) for 24h, after pre-treated with CC for 1h. The quantification of (**A**) p-AMPK/AMPK ratio, (**B**) ABCG5 and (**C**)ABCG8 protein expression in hepG2 cells were shown. And the quantification of (**D**) p-AMPK/AMPK ratio, (**E**) ABCG5 and (**F**)ABCG8 protein expression in Caco2 cells were shown. The mRNA expression of LXRα in (**G**)hepG2 and (**H**)Caco2 cells were detected. The data was shown with mean ±SEM. *P<0.05, compared with DMSO group; #p<0.05, Cana 10µM+CC compared with Cana 10µM.

**Supplementary table1. Antibodies used.**

Supplementary table 1. antibodies used

| **Antibodies** | **Catalog** | **Company** |
| --- | --- | --- |
| **AMPK** | 5831S | Cell Signaling Technology |
| **p-AMPK** | Apo116 | AB clonal |
| **p-AMPK (Thr172)** | 2535 | Cell Signaling Technology |
| **ACC1** | ET1609-77 | Hua bio |
| **p-ACC (Ser79)** | #3661 | Cell Signaling Technology |
| **ABCG5** | 27722-1-Ap | Proteintech |
| **ABCG5** | Sc25796 | Santa Cruz Biotechnology |
| **ABCG8** | Sc30111 | Santa Cruz Biotechnology |
| **β-actin** | A1978 | sigma |
| **Goat anti-Rabbi** | 966-32210 | Licor |

**Supplementary table2. Real-time PCR primers.**

Supplementary table 2. Real-time PCR primers

| **Genes** | **Forward sequence** | **Reverse sequence** |
| --- | --- | --- |
| **mAbcg5** | TCAATGAGTTTTACGGCCTGAA | GCACATCGGGTGATTTAGCA |
| **mAbcg8** | TGCCCACCTTCCACATGTC | ATGAAGCCGGCAGTAAGGTAGA |
| **mCyp7a1** | AGCAACTAAACAACCTGCCAGTACTA | GTCCGGATATTCAAGGATGCA |
| **mCyp8b1** | AGTGCCCTGAAACACACTCC | TCCTCCTGTACCACCCTGAG |
| **mCyp27a1** | CCAGGCACAGGAGAGTACG | GGGCAAGTGCAGCACATAG |
| **mCyp7b1** | GGAGCCACGACCCTAGATG | TGCCAAGATAAGGAAGCCAAC |
| **mHmgcr** | AGCTTGCCCGAATTGTATGTG | TCTGTTGTGAACCATGTGACTTC |
| **mHmgcs** | AACTGGTGCAGAAATCTCTAGC | GGTTGAATAGCTCAGAACTAGCC |
| **mAbca1** | TCCTCATCCTCGTCATTCAAA | GGACTTGGTAGGACGGAACCT |
| **mAbcg1** | CTCCGGCTTCCTCTTCTTCT | TACACGATGCTGCAGTAGGC |
| **m18s** | TTGACTCAACACGGGAAACC | AGACAAATCGCTCCACCAAC |
| **hABCG5** | ACTGCTTCTCCTACGTCCTG | CTGTAGTTGCCAATCAGTCGG |
| **hABCG8** | AGGCCCAGCGTGACAAAAG | TGGGTTCGTCGAGAATAAGGA |
| **hGAPDH** | AACGGATTTGGTCGTATTG | GGAAGATGGTGATGGGATT |

**Supplementary table3. Metabolism parameters of chow diet and western diet fed mice.**

|  | Chow diet | | Western diet | |
| --- | --- | --- | --- | --- |
|  | Ctrl (n=8) | Cana (n=8) | Ctrl (n=8) | Cana (n=8) |
| Body weight(g) | 26.06±0.22 | 23.65±0.37** | 35.41±1.24 | 30.47±0.58## |
| Liver weight/body weight (%) | 3.91±0. 09 | 4.22±0. 06 | 4.06±0. 25 | 4.07±0.04 |
| Food intake(g/d) | / | / | 2.52±0.16 | 2.78±0.17 |
| Blood glucose(mg/dl) | 128.9±5.97 | 87.53±6.20** | 186.1±5.52 | 136.6±4.57## |
| Urine glucose(mg/dl) | 0.21±0.07 | 8170±723.2 | 0.84±0.30 | 6956±602.2 |
| Serum ALT(U/L) | 34.56±0.94 | 39.62±4.10 | 42.49±7.03 | 31.89±2.08## |
| Serum AST(U/L) | 157.8±9.27 | 124.3±9.68* | 158.9±14.5 | 138.3±4.13 |

Data was shown with mean±SEM, *P<0.05, **P<0.01 compared with chow diet group; and #P<0.05, ##P<0.01 compared with western diet group.
